# Supplementary material for: The Autophagy Inhibitor Chloroquine, Alone or in Combination with mTOR Inhibitors, Displays Anti-Tumor Effects in In Vitro and In Vivo Lung Carcinoid Models
Source: MDPI journal article supplement (doi:10.3390/cancers13246327), 2021-12-16

Article

# The Autophagy Inhibitor Chloroquine, Alone or in Combination with mTOR Inhibitors, Displays Anti-Tumor Effects in In Vitro and In Vivo Lung Carcinoid Models

Adi Knigin, Shani Avniel-Polak, Gil Leibowitz, Kira Oleinikov, David J. Gross and Simona Grozinsky-Glasberg

## Supplemental materials

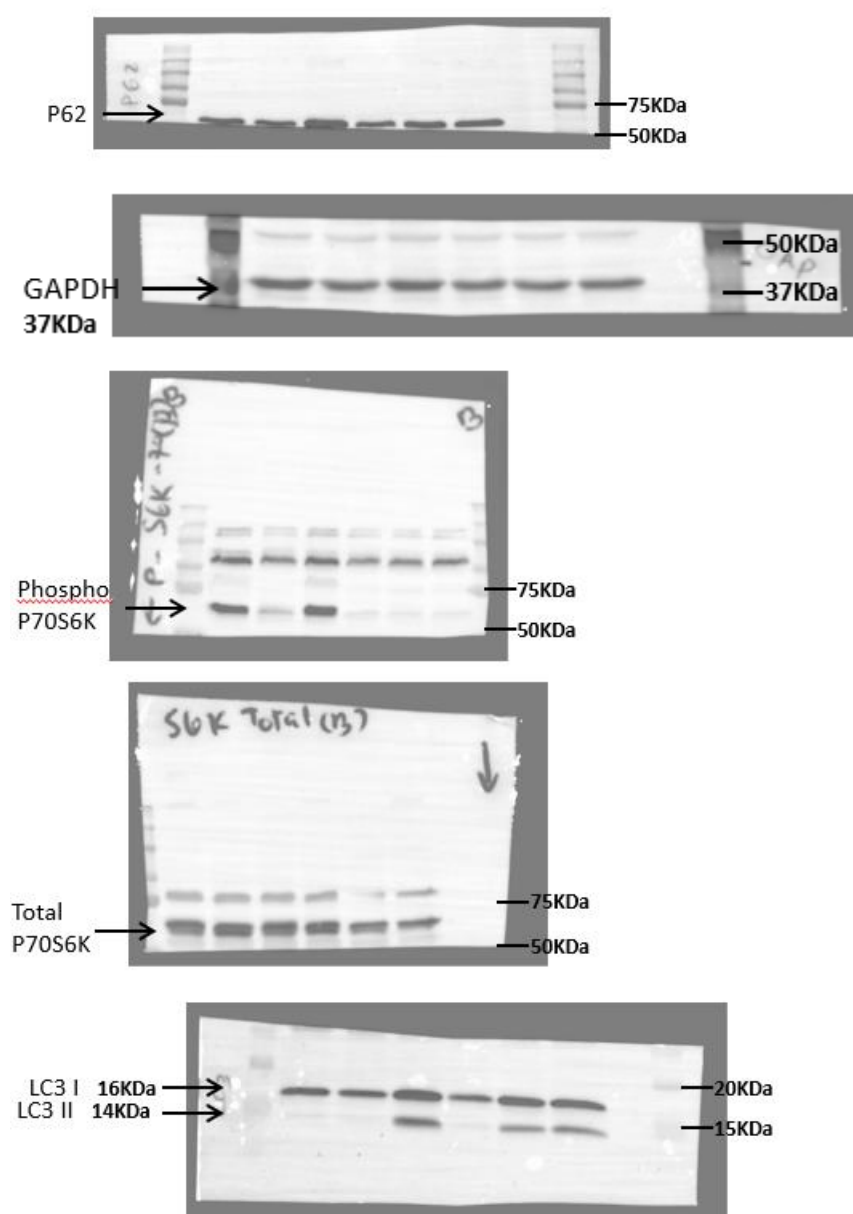

Supplement: s1 [file s1]
